# Supplementary material for: CCR1-mediated accumulation of myeloid cells in the liver microenvironment promoting mouse colon cancer metastasis
Source: Springer Nature journal article supplement (doi:10.1007/s10585-014-9684-z), 2014-10-17

Supplementary Fig. 1

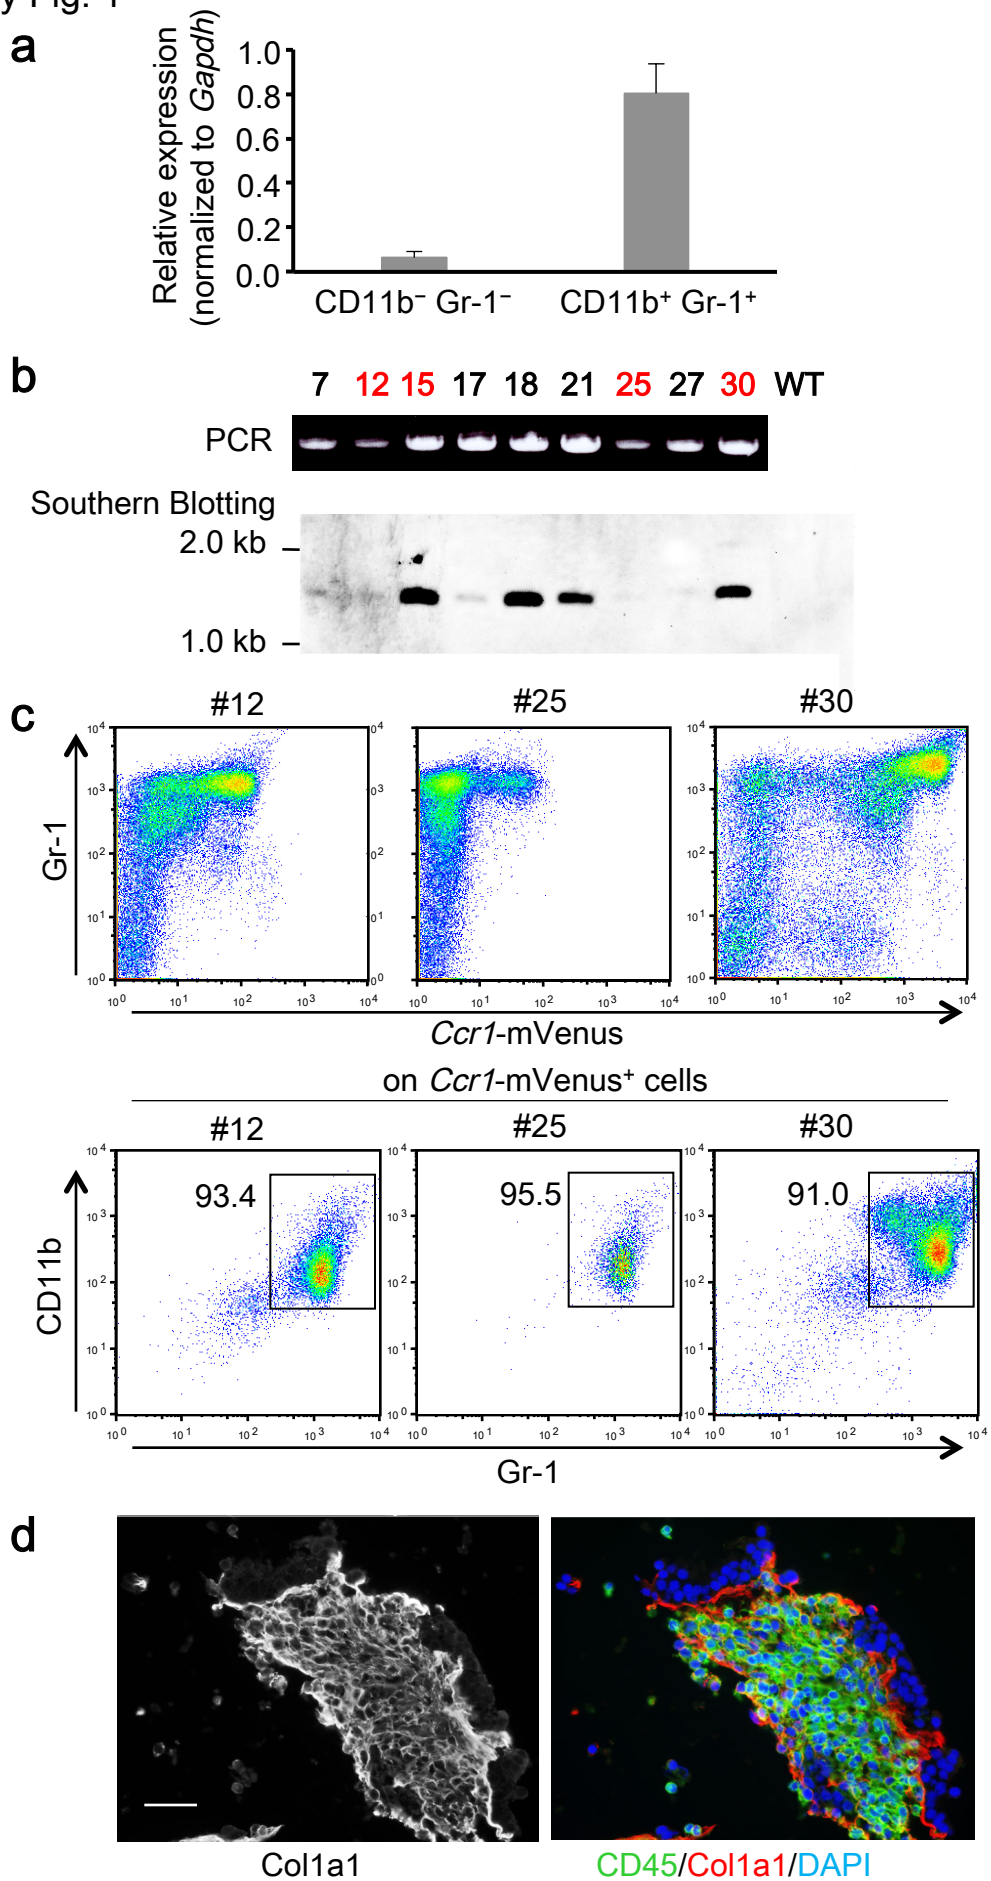

Supplementary Fig. 2

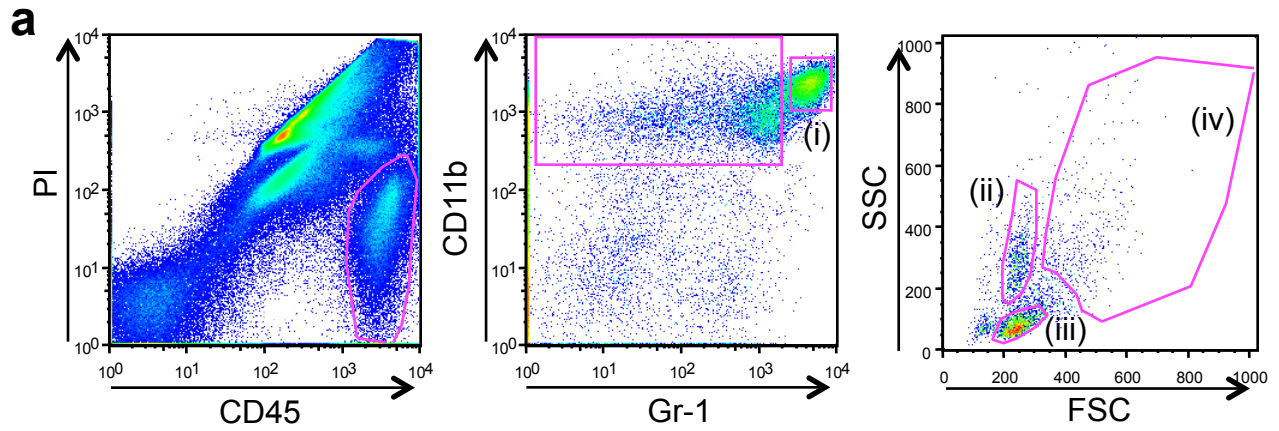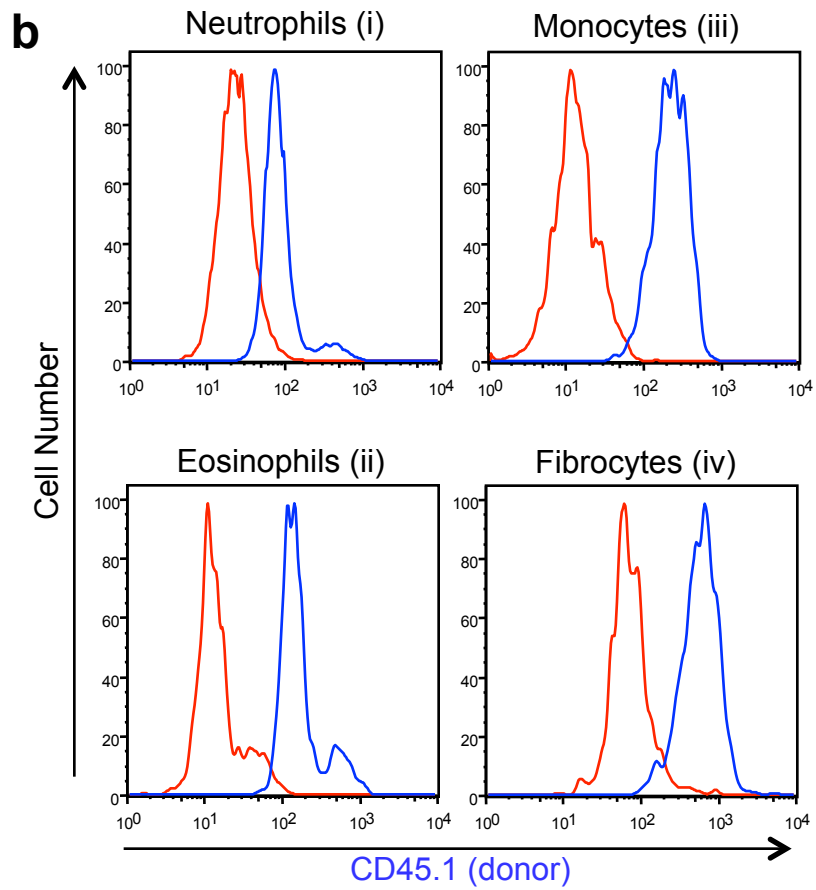

Supplementary Fig. 3

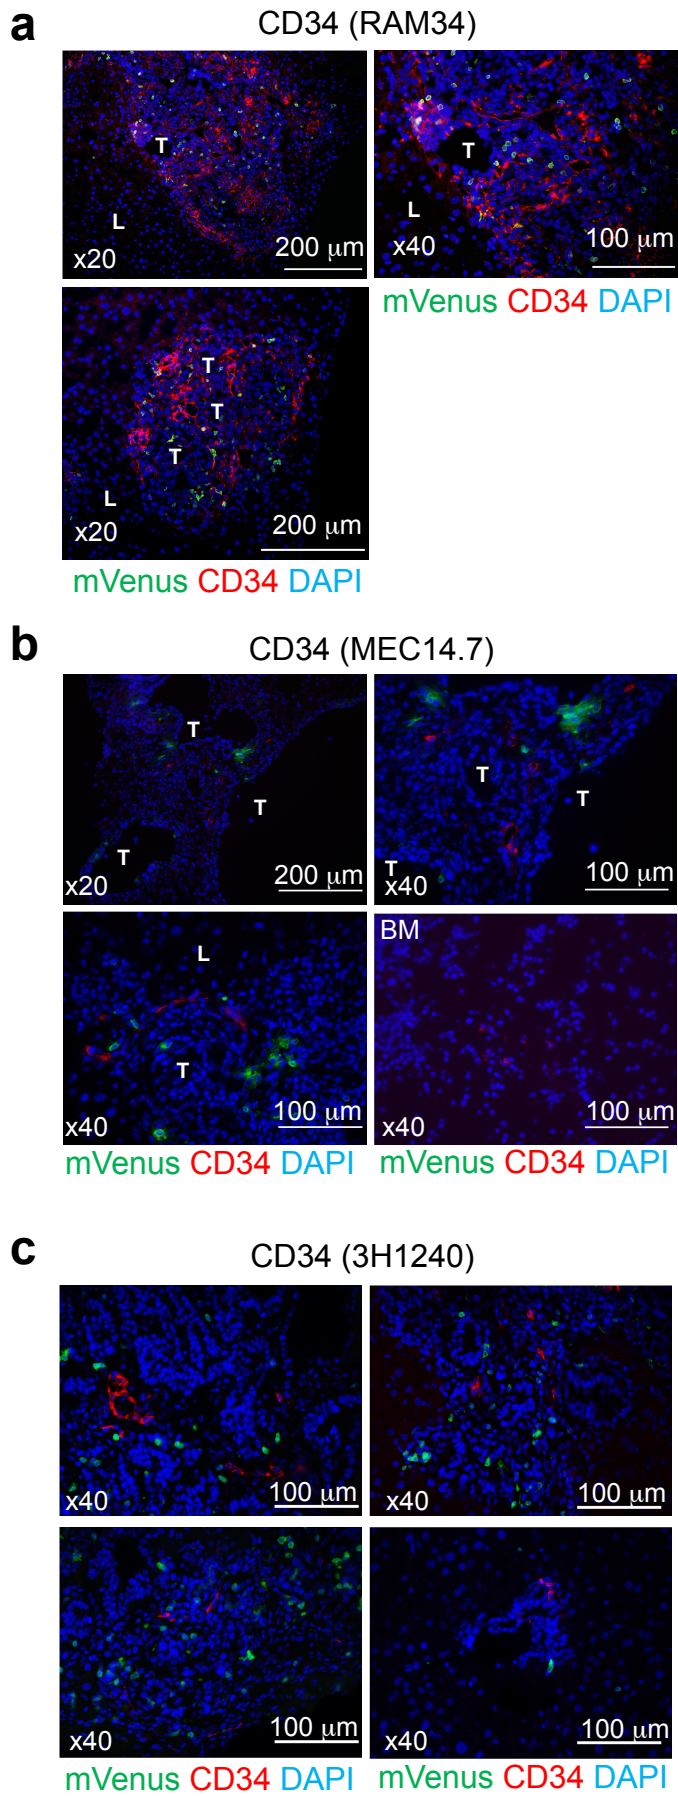

Supplementary Fig. 4

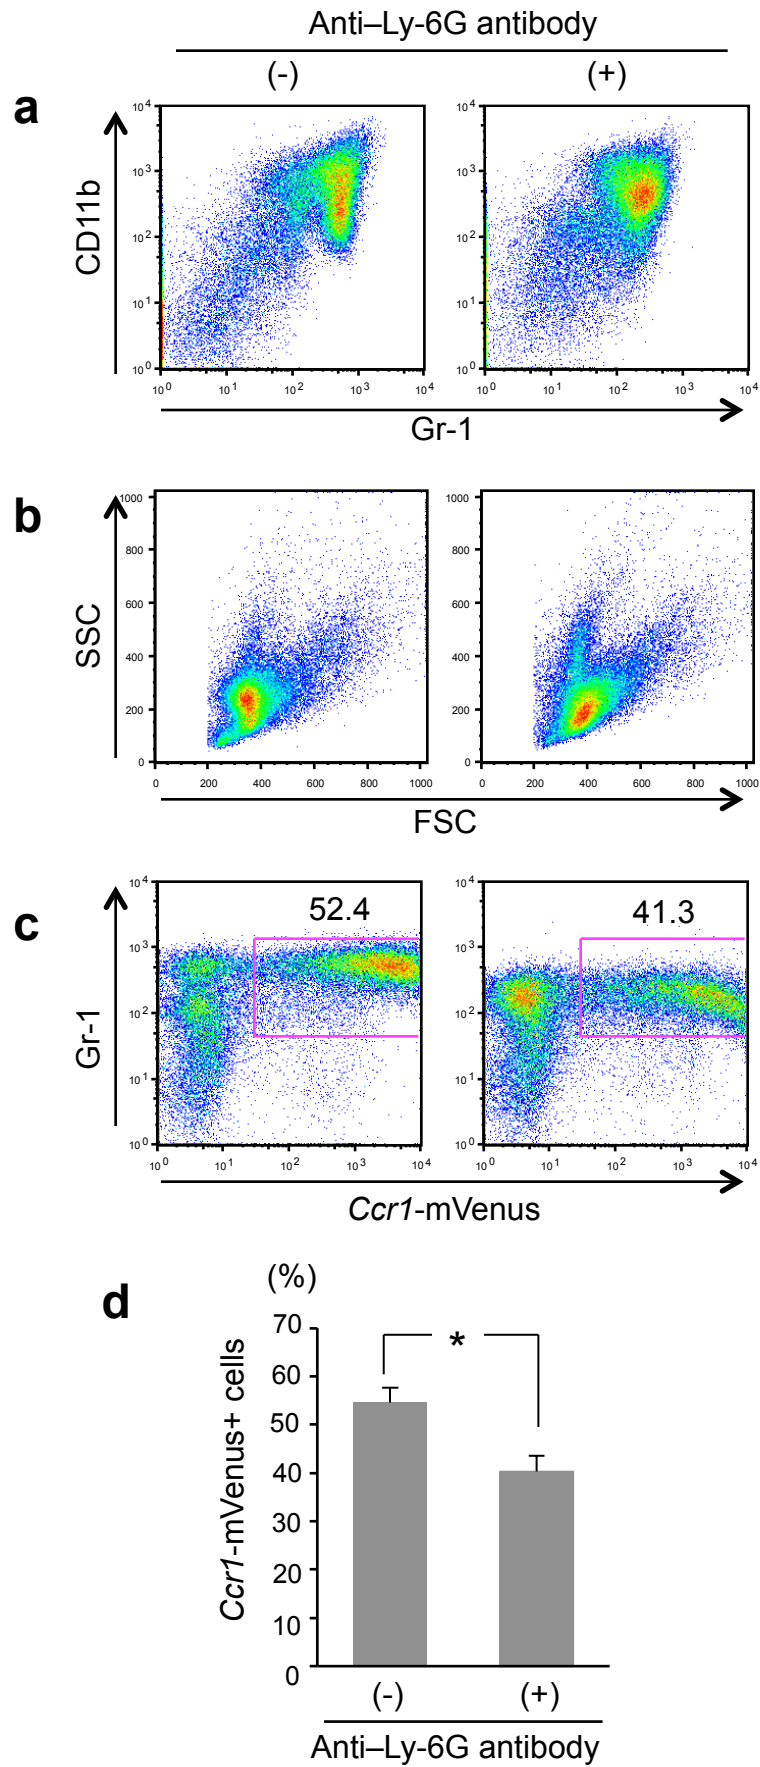



Supplementary Fig. 5

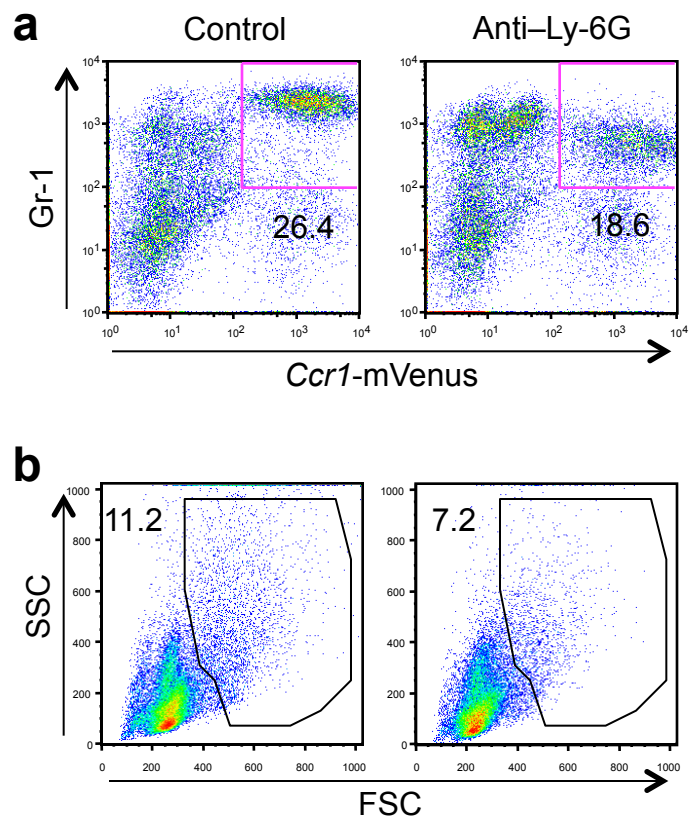

Supplementary Fig. 6

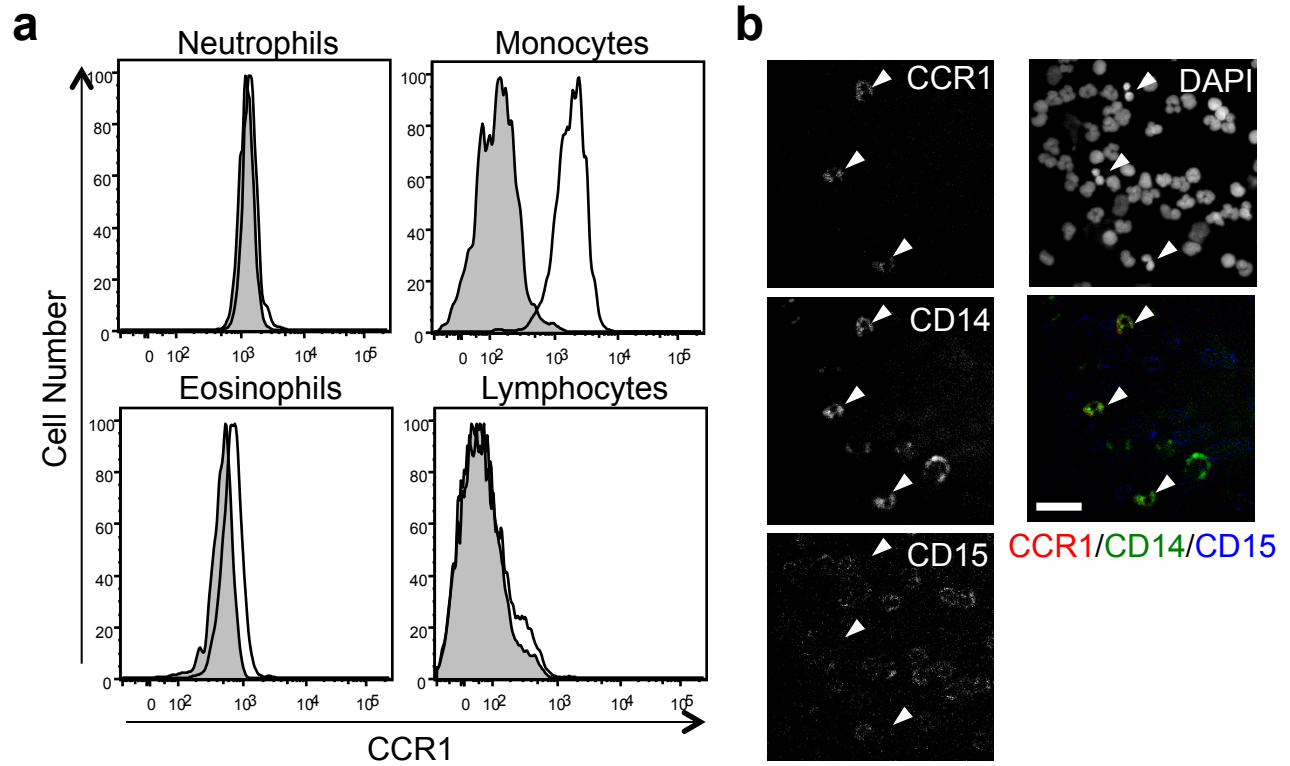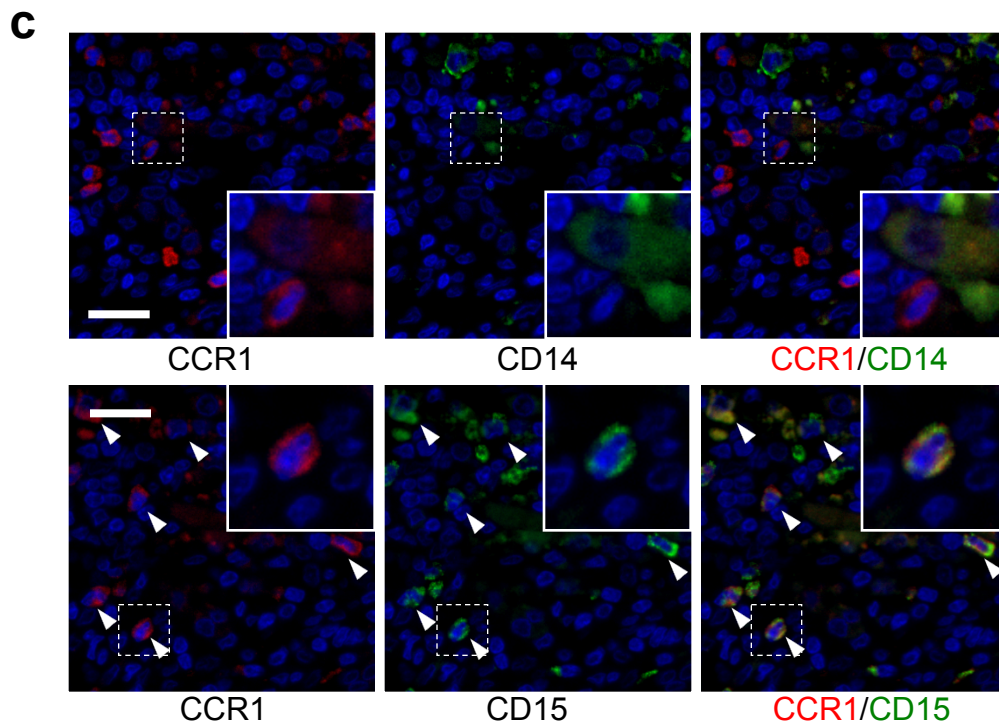

Supplement: MOESM1 [file 8861902]
